# Supplementary material
Source: PubMed Central journal article supplement (PMC5830913)
Supplement: EMBJ-37-e97597-s002.pdf [file EMBJ-37-e97597-s002.pdf]

## Expanded View Figures

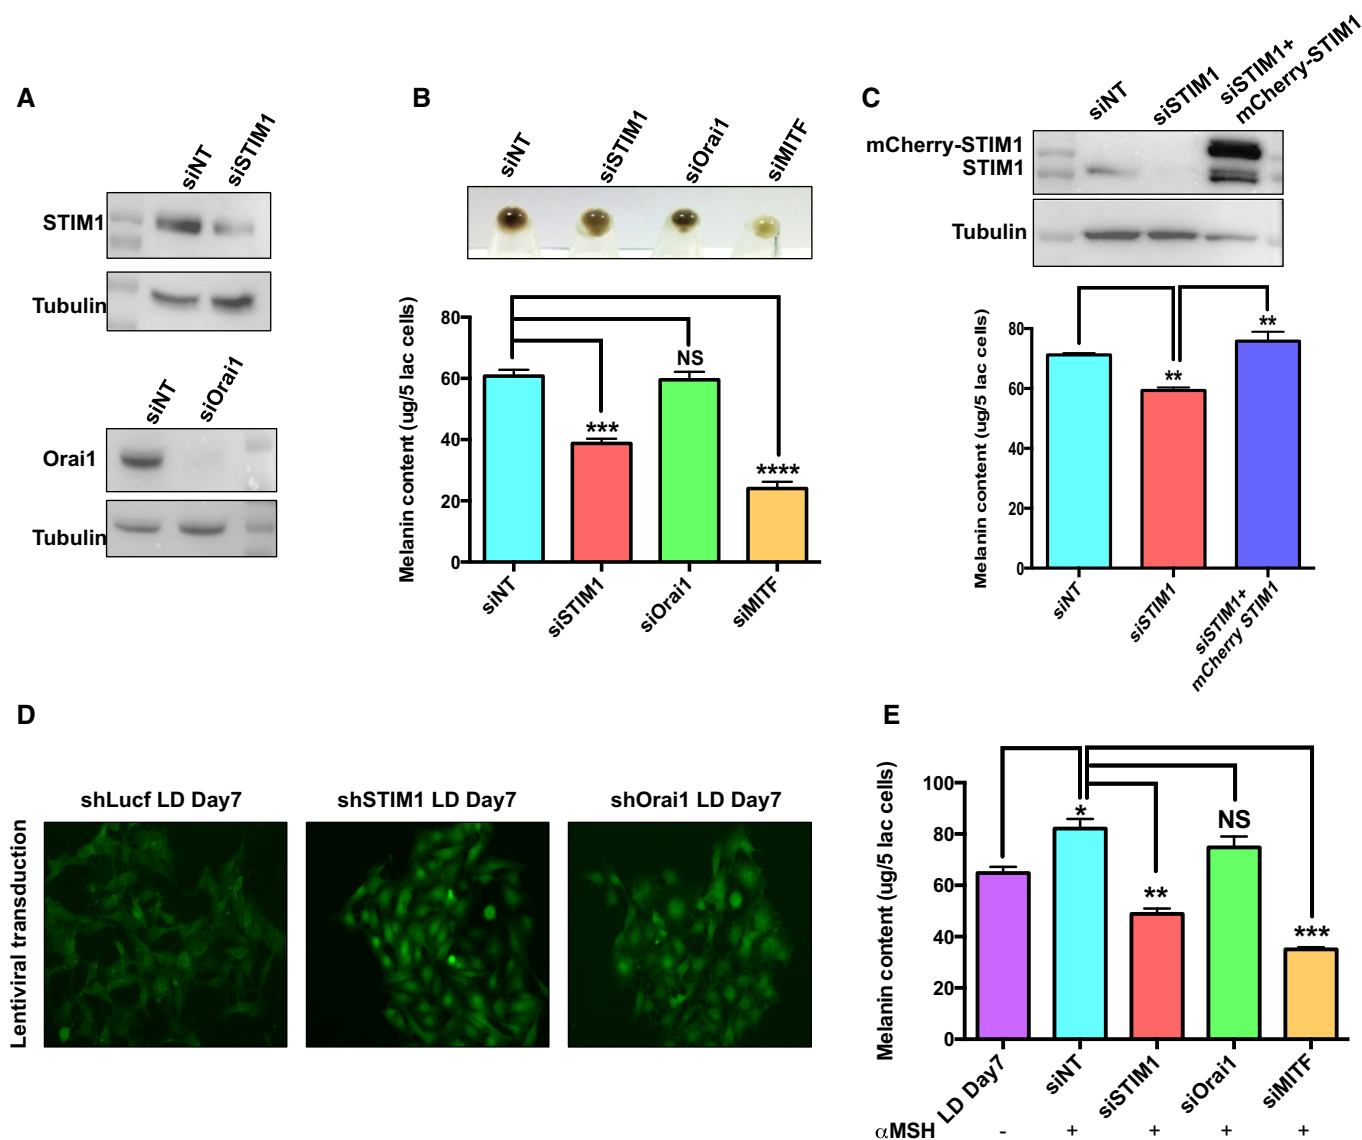**Figure EV1. STIM1 but not Orai1 regulates melanogenesis.**

A Western blots demonstrating siRNA-based knockdown of STIM1 and Orai1.

B Representative cell pellets of LD day 7 upon STIM1, Orai1, and MITF silencing along with melanin content analysis (N = 3).

C Western blot for examining mCherry-STIM1 expression in B16 cells and melanin content analysis for evaluating rescue of pigmentation loss with mCherry-STIM1 (N = 3).

D Lentiviral-transduced B16 stable cell lines used for LD melanogenesis assay showing comparable transduction efficiency.

E Melanin content analysis in the unstimulated LD cells and upon  $\alpha$ MSH stimulation in LD cells transfected with siNT, siSTIM1, siOrai1, or siMITF (N = 3).

Data information: Data represented are Mean  $\pm$  SEM (\*P < 0.05; \*\*P < 0.01, \*\*\*P < 0.001, \*\*\*\*P < 0.0001; unpaired Student's t-test).

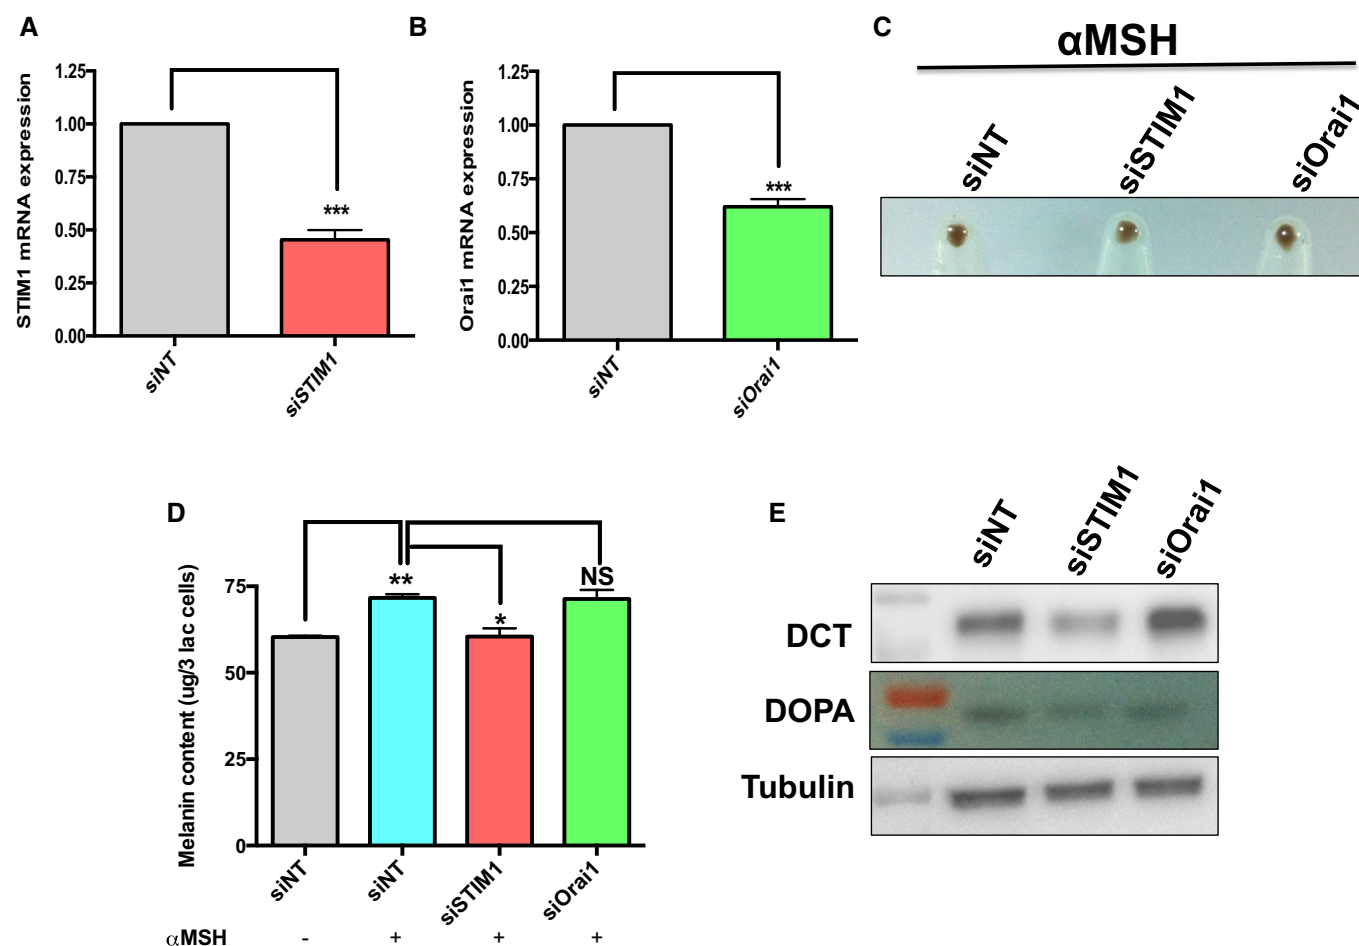

**Figure EV2. STIM1 but not Orai1 regulates  $\alpha$ MSH-induced primary human melanocyte pigmentation.**

A qRT-PCR analysis of STIM1 48 h post-transfection with STIM1 siRNA ( $N = 3$ ).

B qRT-PCR analysis of Orai1 48 h post-transfection with Orai1 siRNA ( $N = 3$ ).

C Primary human melanocyte pellets showing the extent of  $\alpha$ MSH-driven pigmentation upon STIM1 or Orai1 silencing in comparison with siNT control.

D Melanin content analysis evaluating changes in  $\alpha$ MSH-induced pigmentation upon STIM1 and Orai1 silencing ( $N = 3$ ).

E Western blots and gel images of tyrosinase activity (DOPA assay) in primary human melanocytes transfected with either control siRNA or STIM1/Orai1 siRNA.

Data information: Data represented are Mean  $\pm$  SEM (\* $P < 0.05$ ; \*\* $P < 0.01$ , \*\*\* $P < 0.001$ ; unpaired Student's  $t$ -test).

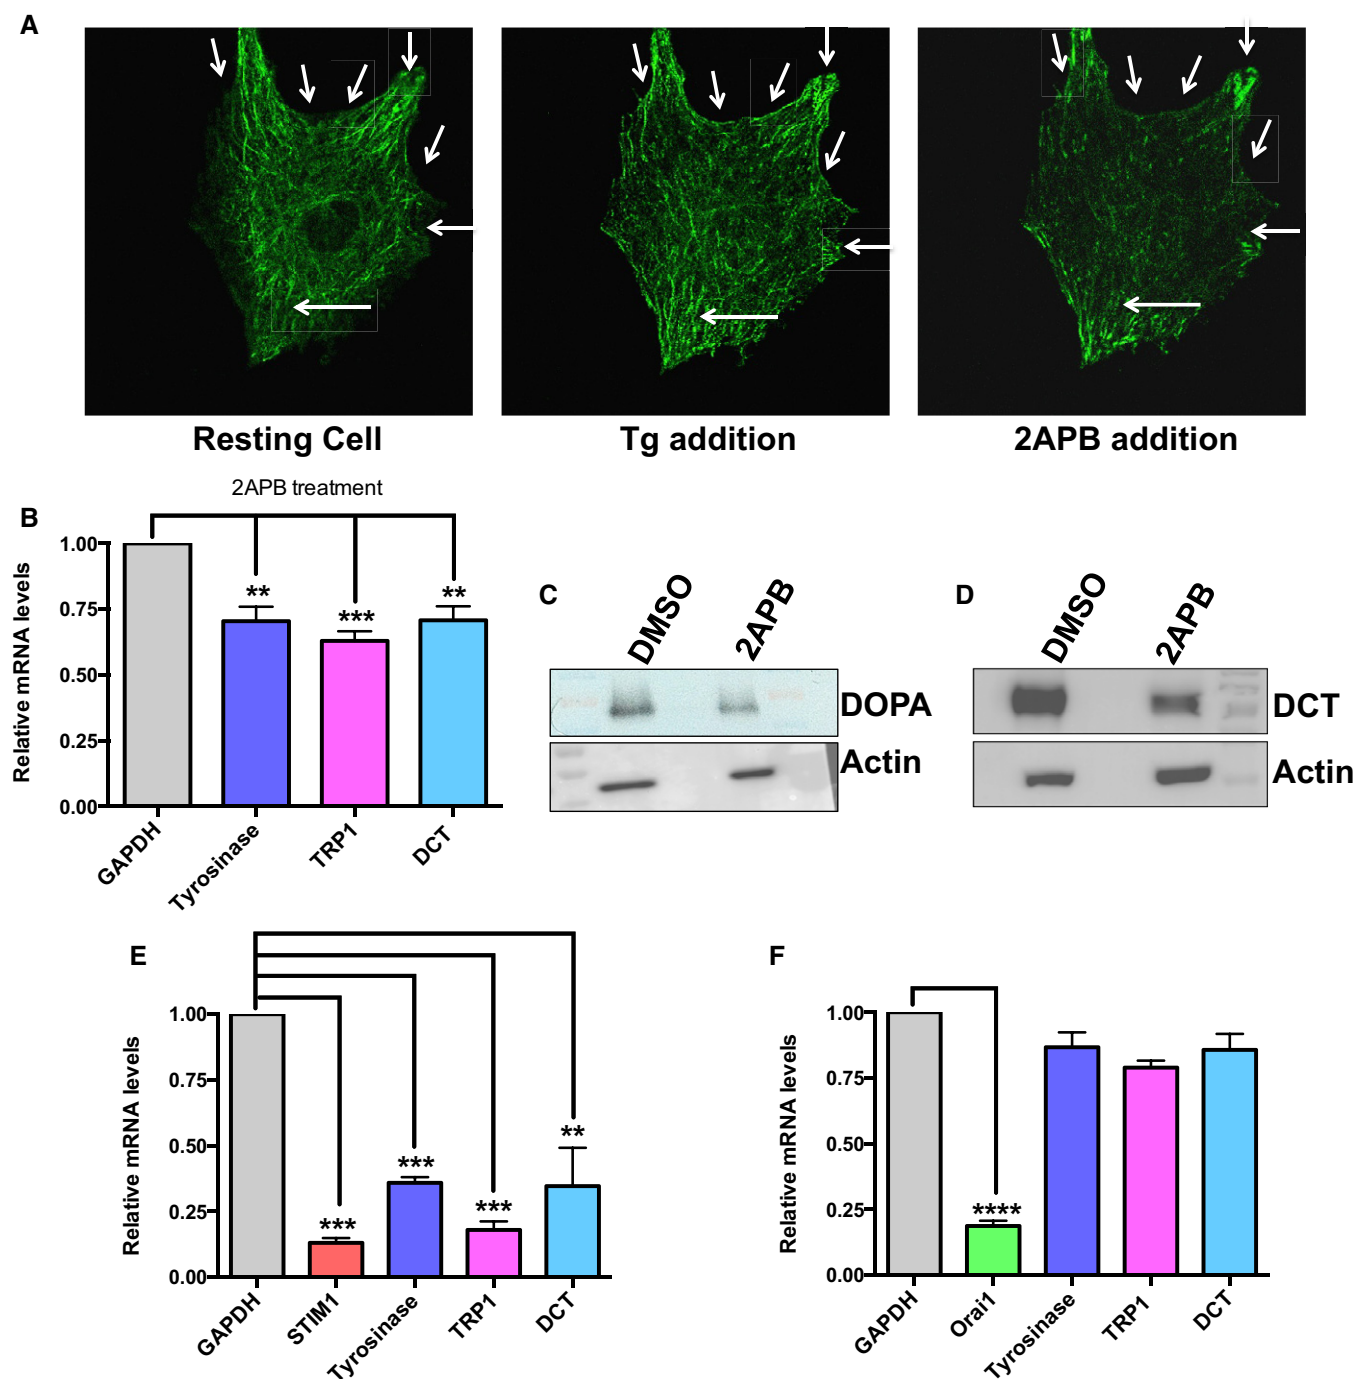

**Figure EV3. STIM1 oligomerization regulates expression of key melanogenic genes.**

**A** Confocal images of B16 cells transfected with eYFP-STIM1 showing that Tg activates STIM1 oligomerization and 2APB disrupts STIM1 puncta. Arrows point to oligomeric STIM1 puncta.

**B** qRT-PCR data demonstrating that 2APB application for 48 h reduces mRNA expression of tyrosinase, TyRP1, and DCT ( $N = 3$ ).

**C, D** Gel images of tyrosinase activity and Western blots for DCT on LD day 7 treated with either vehicle control (DMSO) or 2-APB.

**E** qRT-PCR analysis showing that STIM1 silencing not only decreases mRNA expression of STIM1 but also that of tyrosinase, TyRP1, and DCT ( $N = 3$ ).

**F** qRT-PCR analysis showing that Orai1 knockdown decreases Orai1 mRNA levels, but expression of melanogenic genes remains largely unaffected ( $N = 3$ ).

Data information: Data represented are Mean  $\pm$  SEM (\*\* $P < 0.01$ , \*\*\* $P < 0.001$ ; unpaired Student's  $t$ -test).

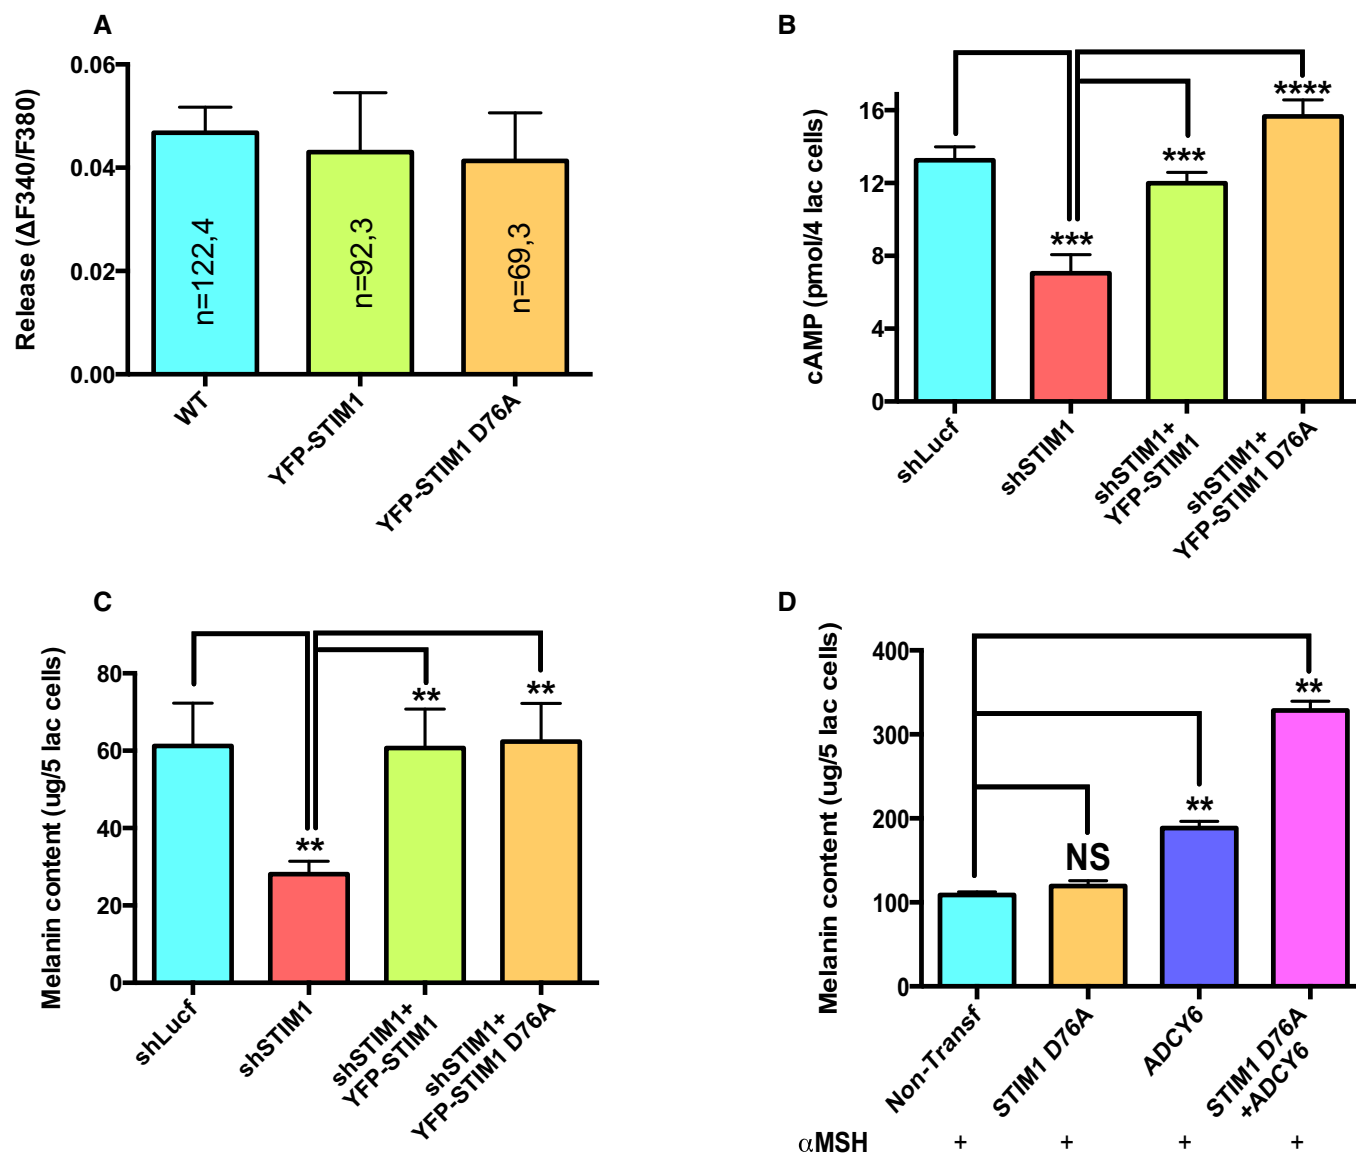

**Figure EV4. Constitutively active STIM1 rescues cAMP generation and melanogenesis.**

A Amplitude of  $\alpha$ MSH-induced  $\text{Ca}^{2+}$  release in WT cells and in cells overexpressing either wild-type STIM1 (YFP-STIM) or constitutively active STIM1 YFP-STIM1 D76A.

B  $\alpha$ MSH-stimulated cAMP generation upon STIM1 silencing and its rescue with YFP-STIM or YFP-STIM1 D76A (N = 4).

C LD day 7 melanin content analysis in the B16 shSTIM1 stables and rescue with YFP-STIM or YFP-STIM1 D76A (N = 6).

D Melanin content analysis of B16 cells stimulated with  $\alpha$ MSH in non-transfected control cells and in cells overexpressing either YFP-STIM1 D76A, ADCY6-CFP, or YFP-STIM1 D76A along with ADCY6-CFP (N = 2).

Data information: Data represented are Mean  $\pm$  SD (\*\* $P$  < 0.01, \*\*\* $P$  < 0.001, \*\*\*\* $P$  < 0.0001; unpaired Student's  $t$ -test). The number of cells in (A) is reported as "n = x, y" where "x" denotes the total number of cells imaged and "y" denotes number of traces recorded for imaging "x" cells.

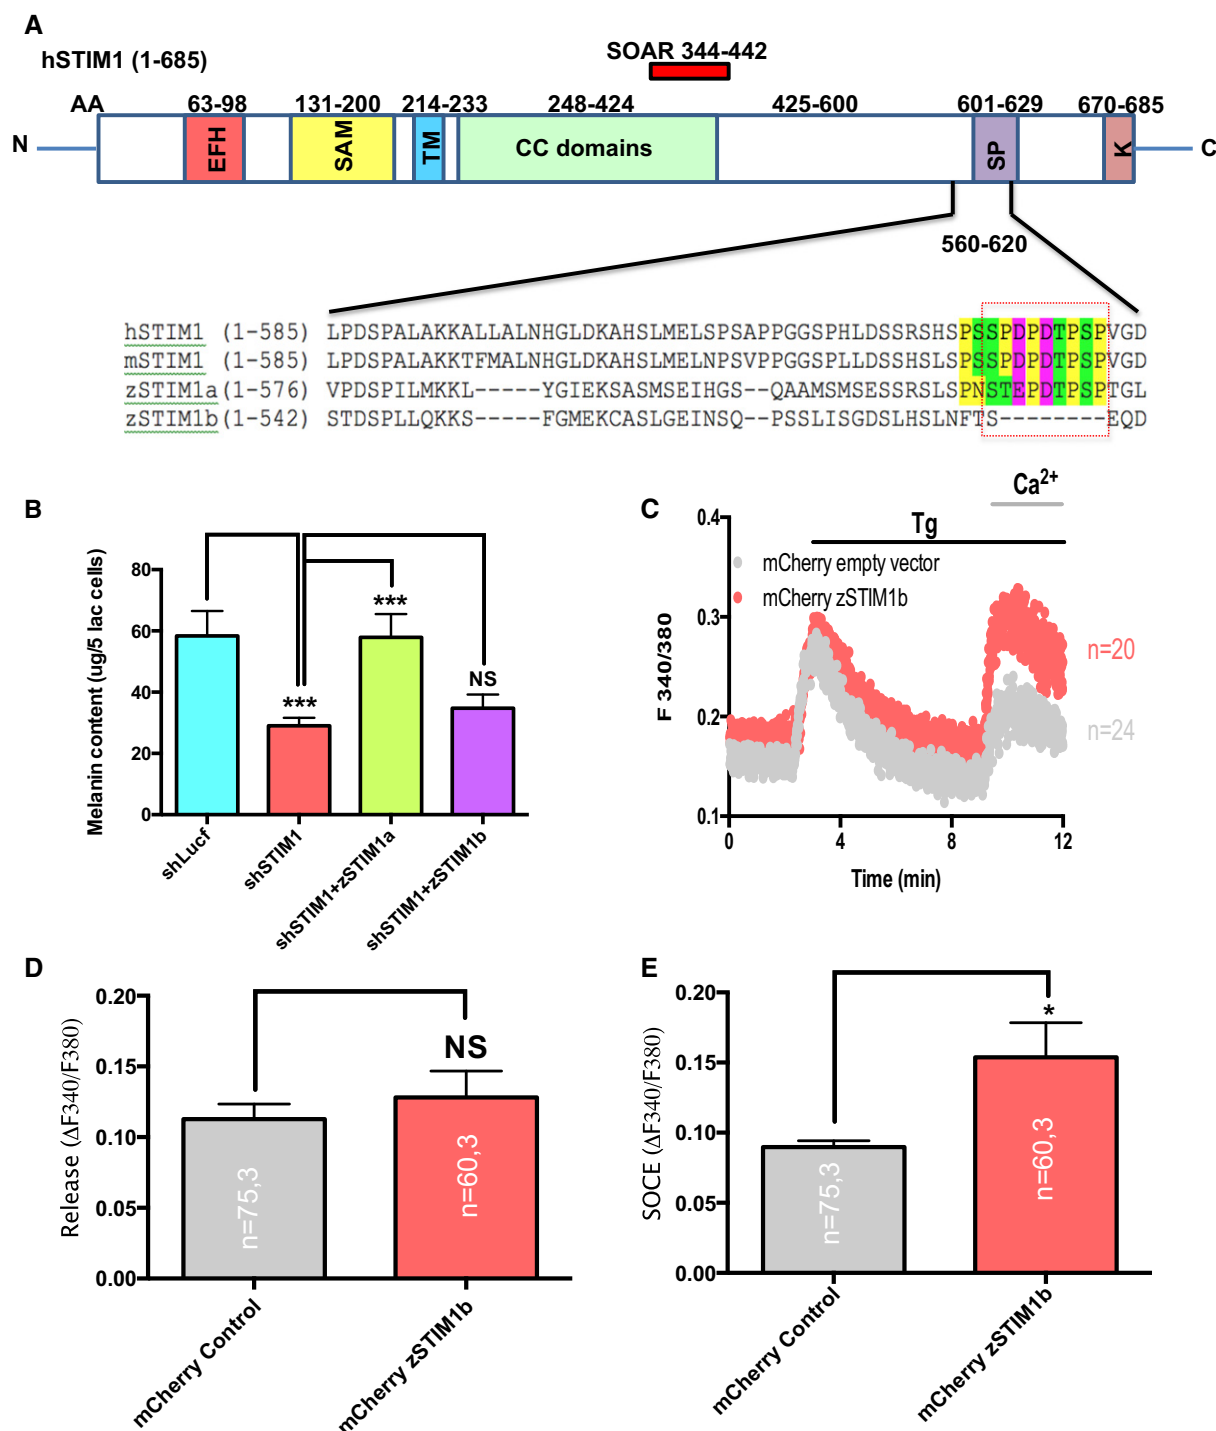

**Figure EV5. STIM1 C-terminus S/P-rich domain regulates STIM1-mediated melanogenesis.**

- A Domain architecture of hSTIM1 and the protein sequence analysis of C-terminus of hSTIM1, mSTIM1, zSTIM1a, and zSTIM1b.
- B Melanin content analysis in B16 shSTIM1 stables and its rescue with zSTIM1a and zSTIM1b (N = 5).
- C Representative SOCE traces of B16 cells expressing either empty mCherry vector or mCherry-zSTIM1b plasmid.
- D The quantitative analysis of ER Ca<sup>2+</sup> release in vector control and zSTIM1b-expressing cells.
- E The analysis of SOCE amplitude upon ectopic expression of zSTIM1b.

Data information: Data represented are Mean  $\pm$  SEM (\**P* < 0.05; \*\*\**P* < 0.001; unpaired Student's *t*-test). (D, E) The number of cells are reported as "n = x, y" where "x" denotes the total number of cells imaged and "y" denotes number of traces recorded for imaging "x" cells.
