# Supplementary material
Source: PubMed Central journal article supplement (PMC5830913)

# Source Data Fig 8F.

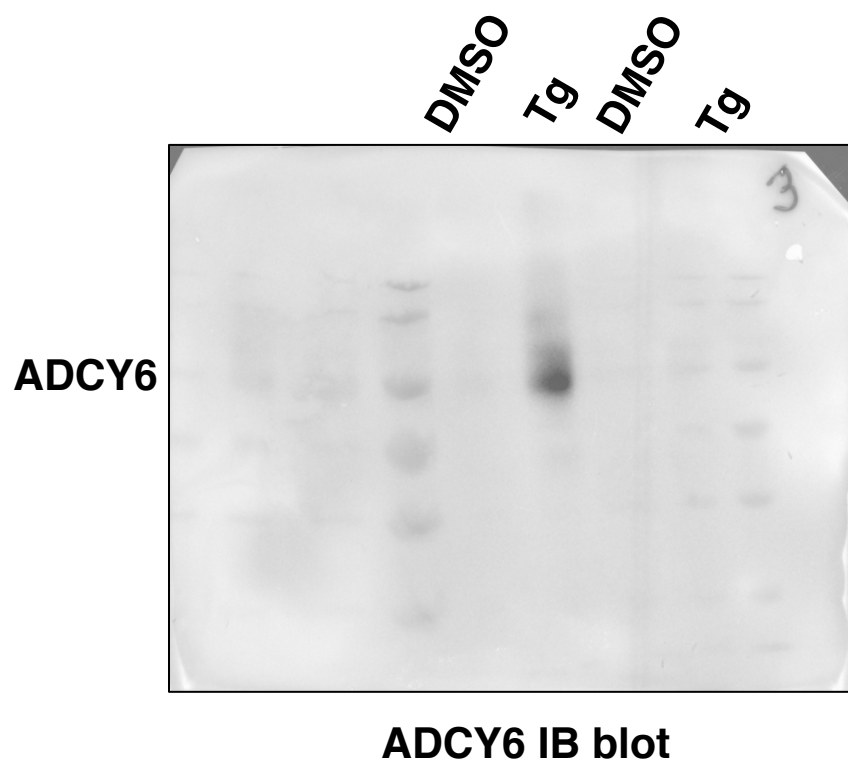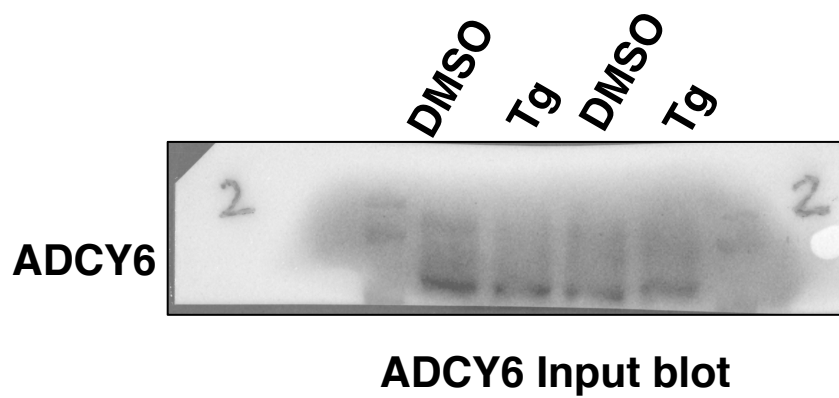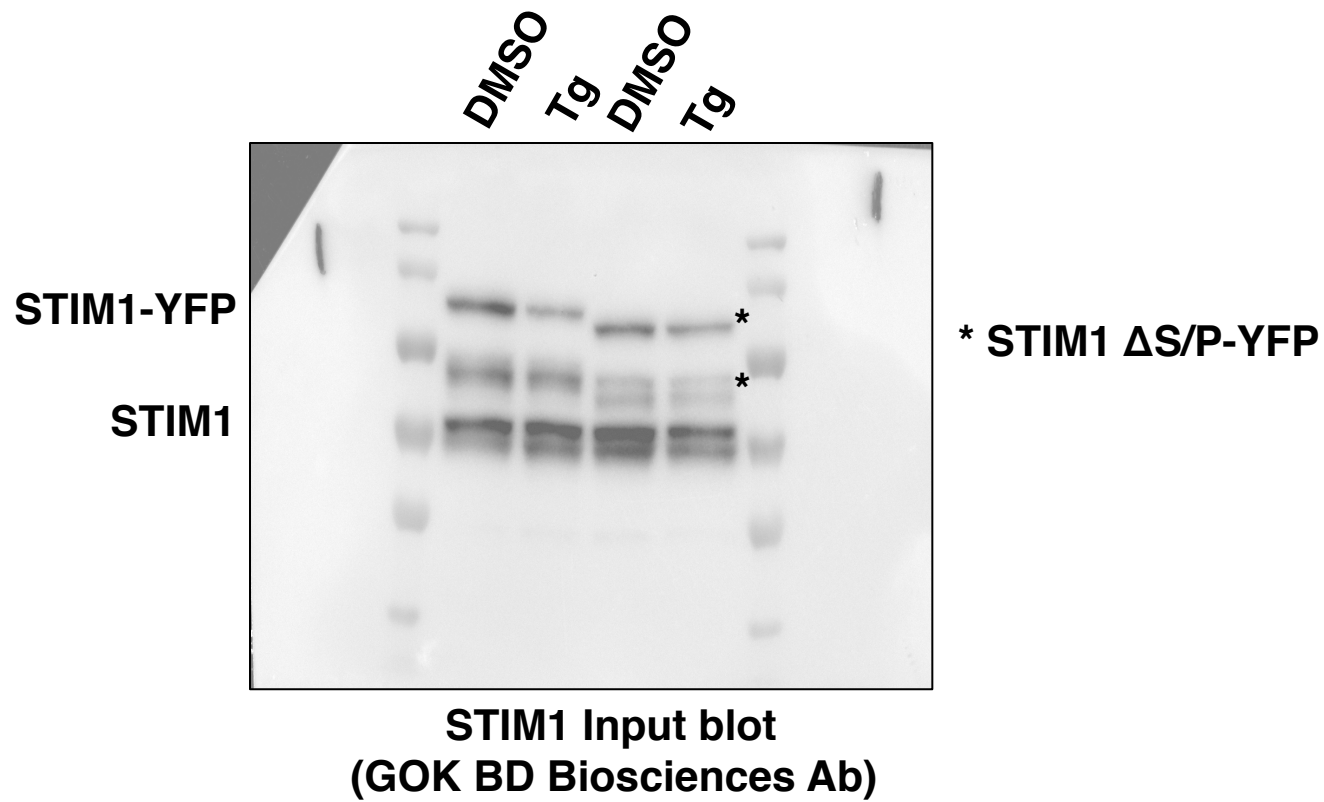

Supplement: EMBJ-37-e97597-s006.pdf [file EMBJ-37-e97597-s006.pdf]
